# Supplementary material for: A fluoresceinylcarbonate-based fluorescent probe for the sensitive detection of biothiols in a HEPES buffer and its cellular expression
Source: Royal Society of Chemistry journal article supplement (doi:10.1039/c3ra42935k), 2013-11-11
Supplement: c3ra42935k.pdf [file c3ra42935k.pdf]

Supporting Information for:

# Fluoresceinylcarbonate-based fluorescent probe for the rapid and sensitive detection of biothiols in a HEPES buffer and its cellular expression

Keum-Hee Hong,<sup>a</sup> Dae Il Kim,<sup>b</sup> Hyockman Kwon,<sup>b</sup> and Hae-Jo Kim<sup>a,\*</sup>

*Department of Chemistry and Department of Bioscience and Biotechnology, Hankuk University of Foreign Studies, Yongin 449-791, Republic of Korea*

haejkim@hufs.ac.kr

## Contents

|                 |       |    |
|-----------------|-------|----|
| 1. NMR spectra  | ..... | S2 |
| 2. Mass spectra | ..... | S4 |

## 1. NMR spectra

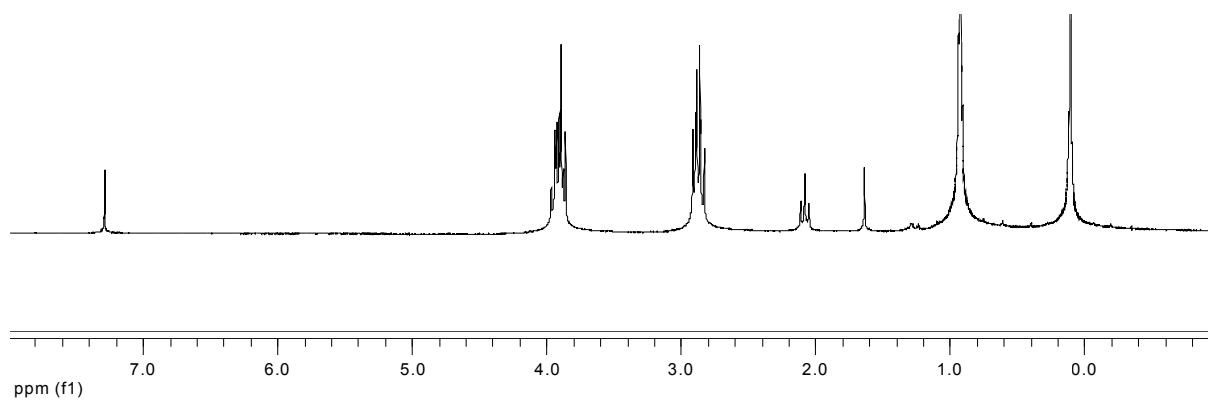

Figure S1. <sup>1</sup>H spectra of compound **3** in CDCl<sub>3</sub>.

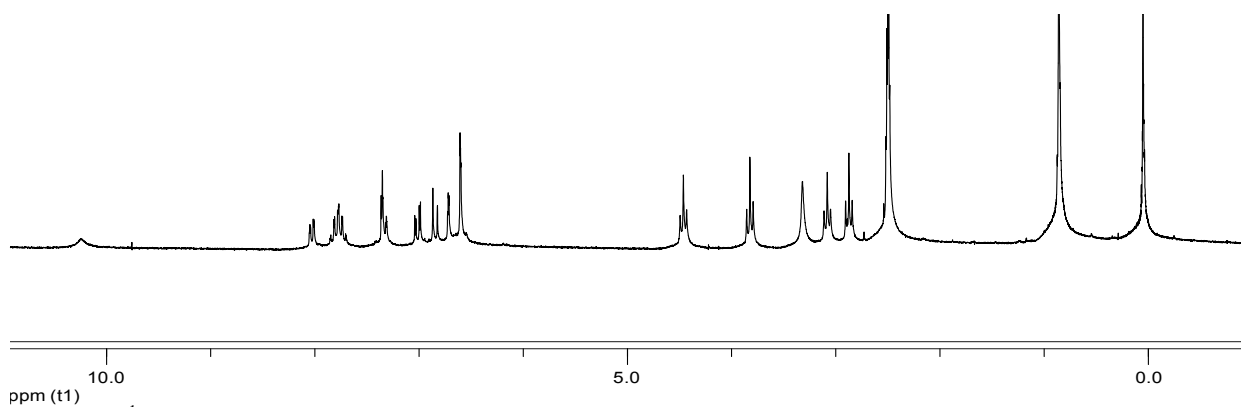

Figure S2. <sup>1</sup>H spectra of compound **5** in DMSO-*d*<sub>6</sub>.

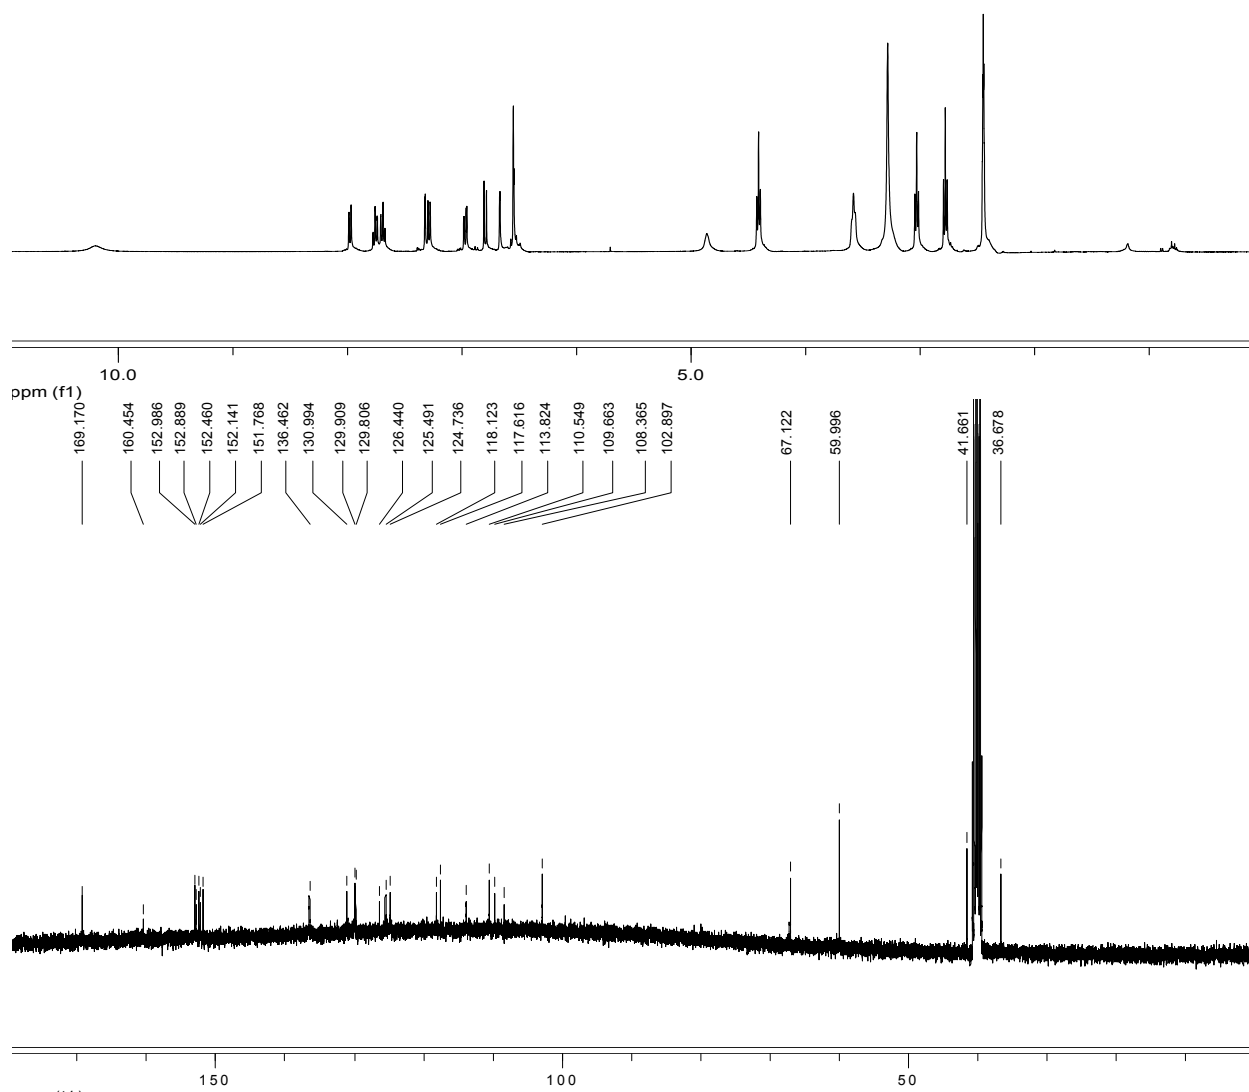

Figure S3. <sup>1</sup>H and <sup>13</sup>C NMR spectra of **1** in DMSO-*d*<sub>6</sub>.

## 2. Mass spectra

[ Mass Spectrum ]  
 Date : 11-Jun-2013 16:43  
 Sample: Fluo\_monodisulfide  
 Note : m-NBA  
 Inlet : Direct Ion Mode : FAB+  
 Spectrum Type : Normal Ion [MF-Linear]  
 RT : 0.50 min Scan# : (2,7)  
 BP : m/z 93.0000 Int. : 219.69  
 Output m/z range : 10.0000 to 600.5045 Cut Level : 0.00 %

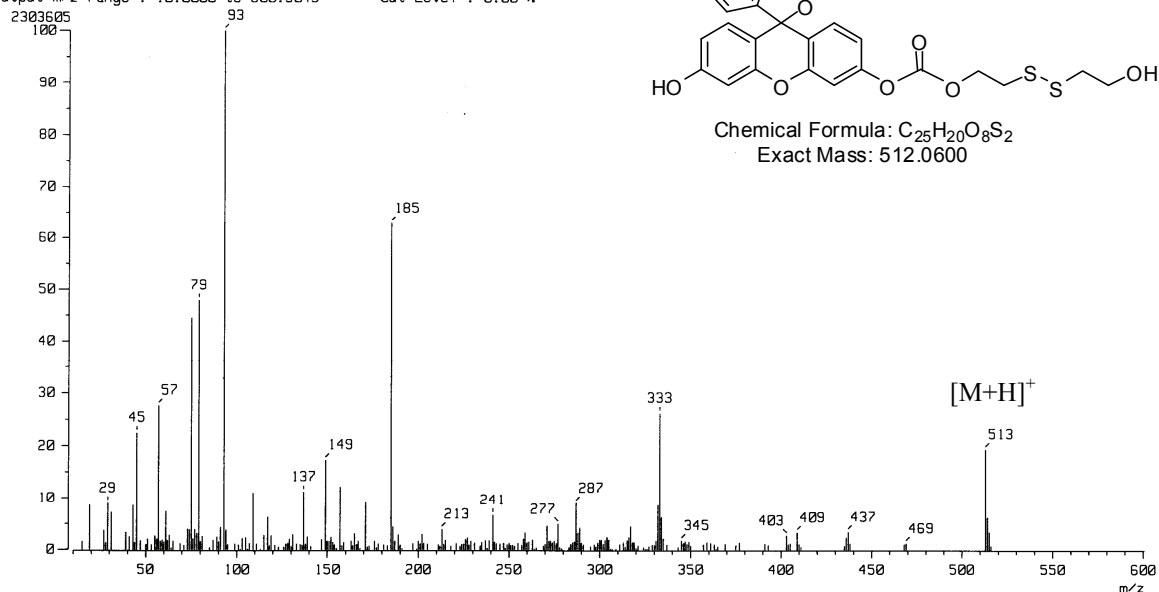

[ Elemental Composition ]

Date : 11-Jun-2013 16:55  
 Sample: Fluo\_monodisulfide  
 Note : Glycerol + DMSO  
 Inlet : Direct Ion Mode : FAB+  
 RT : 0.07 min Scan# : (3,5)  
 Elements : C 100/0, H 150/0, O 10/0, S 3/0  
 Mass Tolerance : 1000ppm, 3mmu if m/z < 3, 5mmu if m/z > 5  
 Unsaturation (U.S.) : 0.0 - 50.0

Page: 1

| Observed m/z | Int%  | Err [ppm / mmu] | U.S. | Composition       |
|--------------|-------|-----------------|------|-------------------|
| 513.0677     | 100.0 | -5.2 / -2.7     | 38.5 | C 42 H 9          |
|              |       | +6.5 / +3.3     | 21.5 | C 28 H 17 O 8 S   |
|              |       | -0.1 / +0.0     | 17.5 | C 25 H 21 O 8 S 2 |
|              |       | +4.8 / +2.5     | 22.5 | C 29 H 21 O 3 S 3 |
|              |       | -6.6 / -3.4     | 13.5 | C 22 H 25 O 8 S 3 |

[ Theoretical Ion Distribution ]

Molecular Formula : C<sub>25</sub> H<sub>21</sub> O<sub>8</sub> S<sub>2</sub>  
 (m/z 513.0678, MW 513.5689, U.S. 17.5)  
 Base Peak : 513.0678, Averaged MW : 513.5635(a), 513.5648(w)

Page: 1

| m/z      | INT.     |
|----------|----------|
| 513.0678 | 100.0000 |
| 514.0709 | 29.6892  |
| 515.0675 | 14.7114  |
| 516.0692 | 3.4260   |
| 517.0679 | 0.8415   |
| 518.0688 | 0.1509   |
| 519.0692 | 0.0245   |
| 520.0702 | 0.0034   |
| 521.0713 | 0.0004   |
